# Supplementary material for: Optimization of LiCoO2 thick electrodes with low tortuosity for lithium-ion batteries by 3D printing
Source: Royal Society of Chemistry journal article supplement (doi:10.1039/d5ta00723b), 2025-01-01
Supplement: d5ta00723b2.pdf [file d5ta00723b2.pdf]

## Optimization of LiCoO<sub>2</sub> Thick Electrodes with Low Tortuosity for Lithium-Ion Batteries by 3D Printing

Shu Xu, Shaopeng Li, Lingtong Zhu, Yining Zhao, Hui Dou\*, Xiaogang Zhang\*

*Jiangsu Key Laboratory of Materials and Technologies for Energy Storage, College  
of Materials Science and Technology, Nanjing University of Aeronautics and  
Astronautics, Nanjing 210016, P. R. China.*

*E-mail: Hui Dou: dh\_msc@nuaa.edu.cn; Xiaogang Zhang: azhangxg@nuaa.edu.cn*

### Appendix A. Supplementary Data

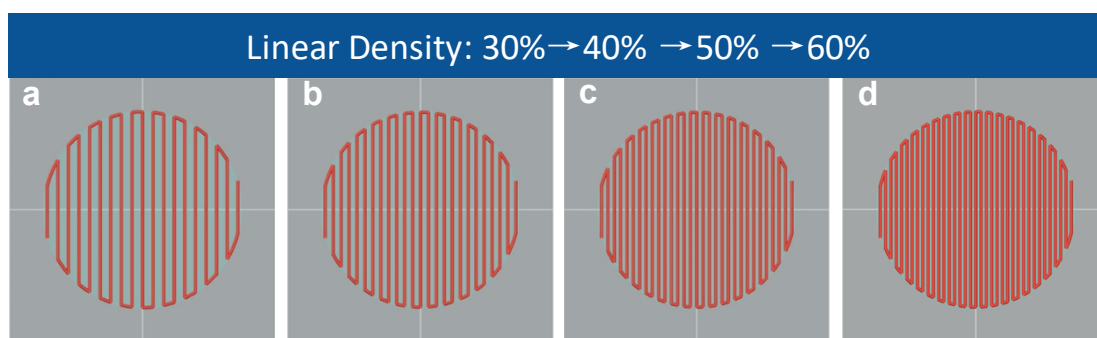

**Fig. S1** (a) 30A-LCO, (b) 40A-LCO, (c) 50A-LCO, (d) 60A-LCO electrode printing models

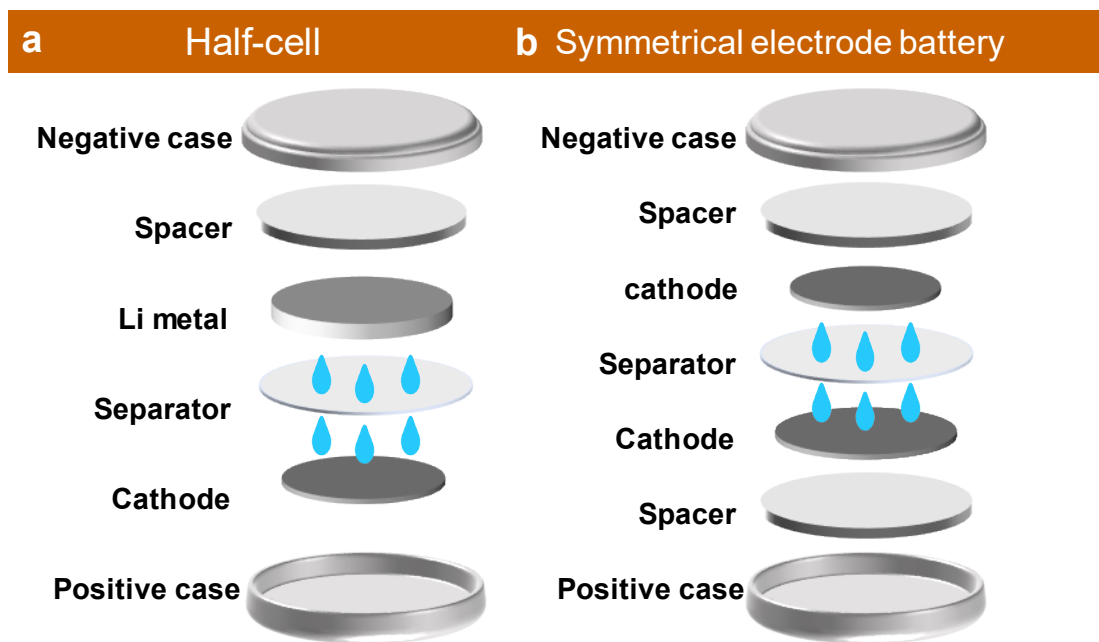

**Fig. S2** (a) half battery, (b) symmetrical electrode battery assembly diagram

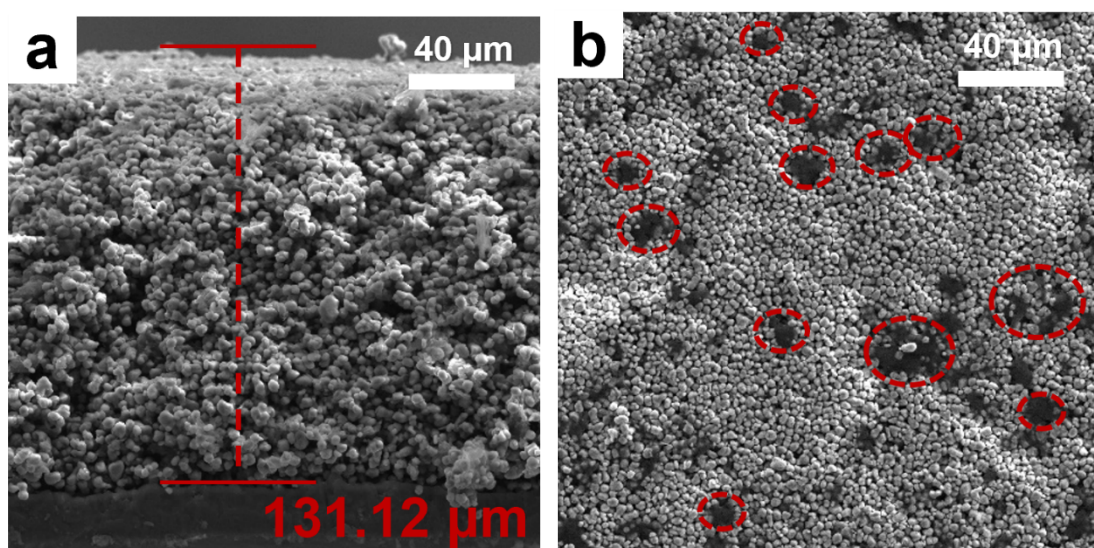

**Fig. S3** SEM images of (a) cross-section and (b) surface of the flat electrode (the red circle is where the conductive agents gather)

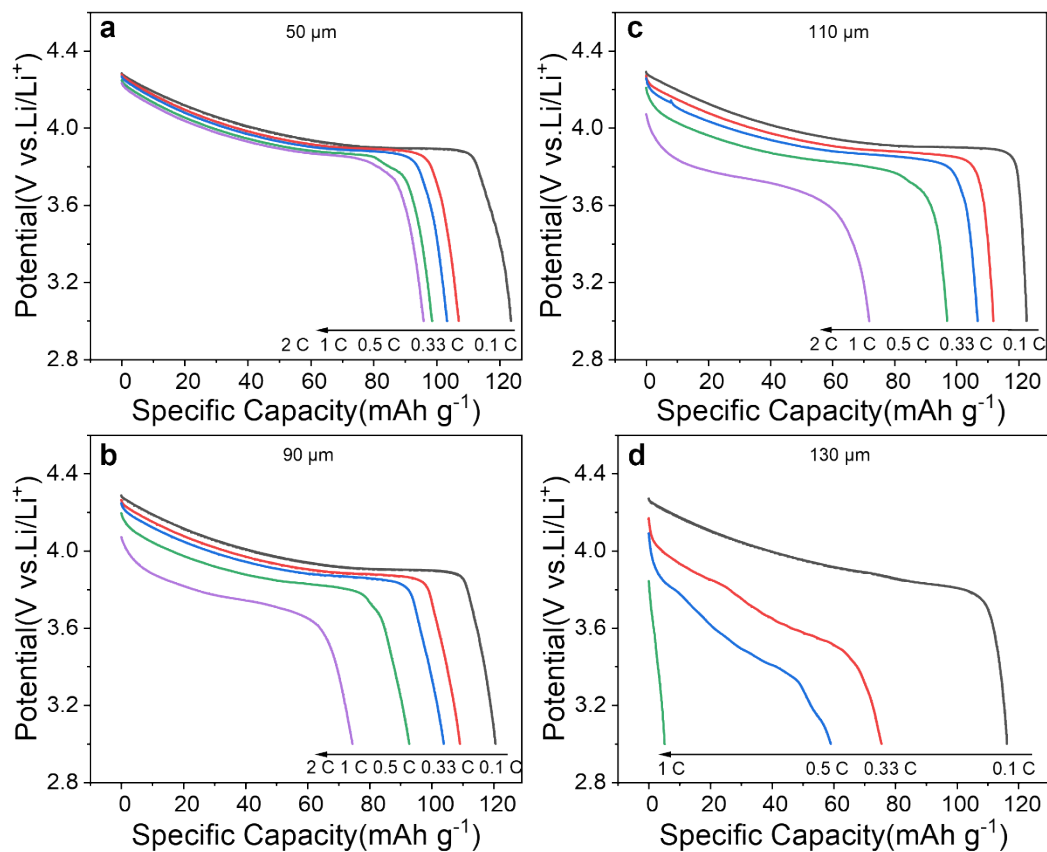

**Fig S4** The rate performance of the flat-plate structure electrodes of different thickness

(a) 50, (b) 90, (c) 110, (d) 130 μm. (1 C= 140 mAh g<sup>-1</sup>)

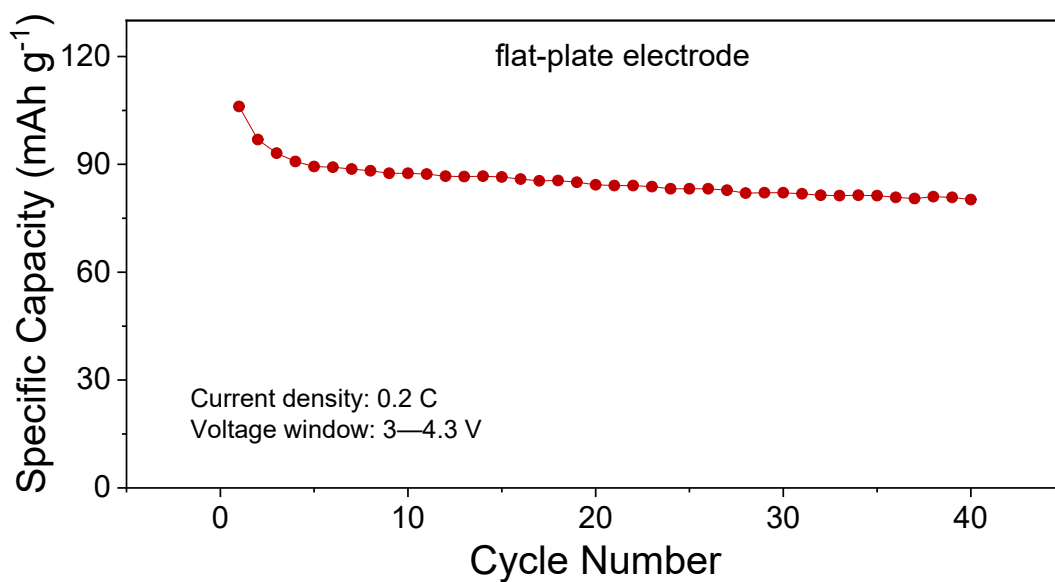

**Fig S5** The cycle performance of the flat-plate structure electrodes (1 C= 140 mAh g<sup>-1</sup>)

The impedance of the symmetric electrode battery system follows the equation given

in Formula 1.1:

$$Z_{\omega} = \sqrt{\frac{R_{ion,L}}{j\omega C_{dl,A} 2\pi r}} \coth \sqrt{R_{ion,L} \cdot j\omega C_{dl,A} 2\pi r L} \# \quad (1.1)$$

As  $\omega$  approaches 0, the limiting values of the real and imaginary parts satisfy the equations given in Formula 1.2 and Formula 1.3, respectively:

$$Z_{\omega \rightarrow 0}^{\prime} = \frac{R_{ion}}{3} \# \quad (1.2)$$

$$Z_{\omega \rightarrow 0}^{\prime\prime} = \frac{1}{\omega C_{dl}} \# \quad (1.3)$$

where  $R_{ion}$  represents the resistance for lithium-ion transport in the liquid phase, and the relationship between  $R_{ion}$  and tortuosity is described by Equation 1.4:

$$\tau = \frac{R_{ion} A \epsilon \kappa}{2d} \# \quad (1.4)$$

where  $A$  is the electrode surface area,,  $\kappa$  is the ionic conductivity of the electrolyte, and  $d$  is the electrode thickness.

The electrode porosity  $\epsilon$  satisfies the following equation (1.5):

$$\epsilon = 1 - \frac{m_{areal}}{d} \left( \frac{\omega_{AM}}{\rho_{AM}} + \frac{\omega_B}{\rho_B} + \frac{\omega_{CA}}{\rho_{CA}} \right) \# \quad (1.5)$$

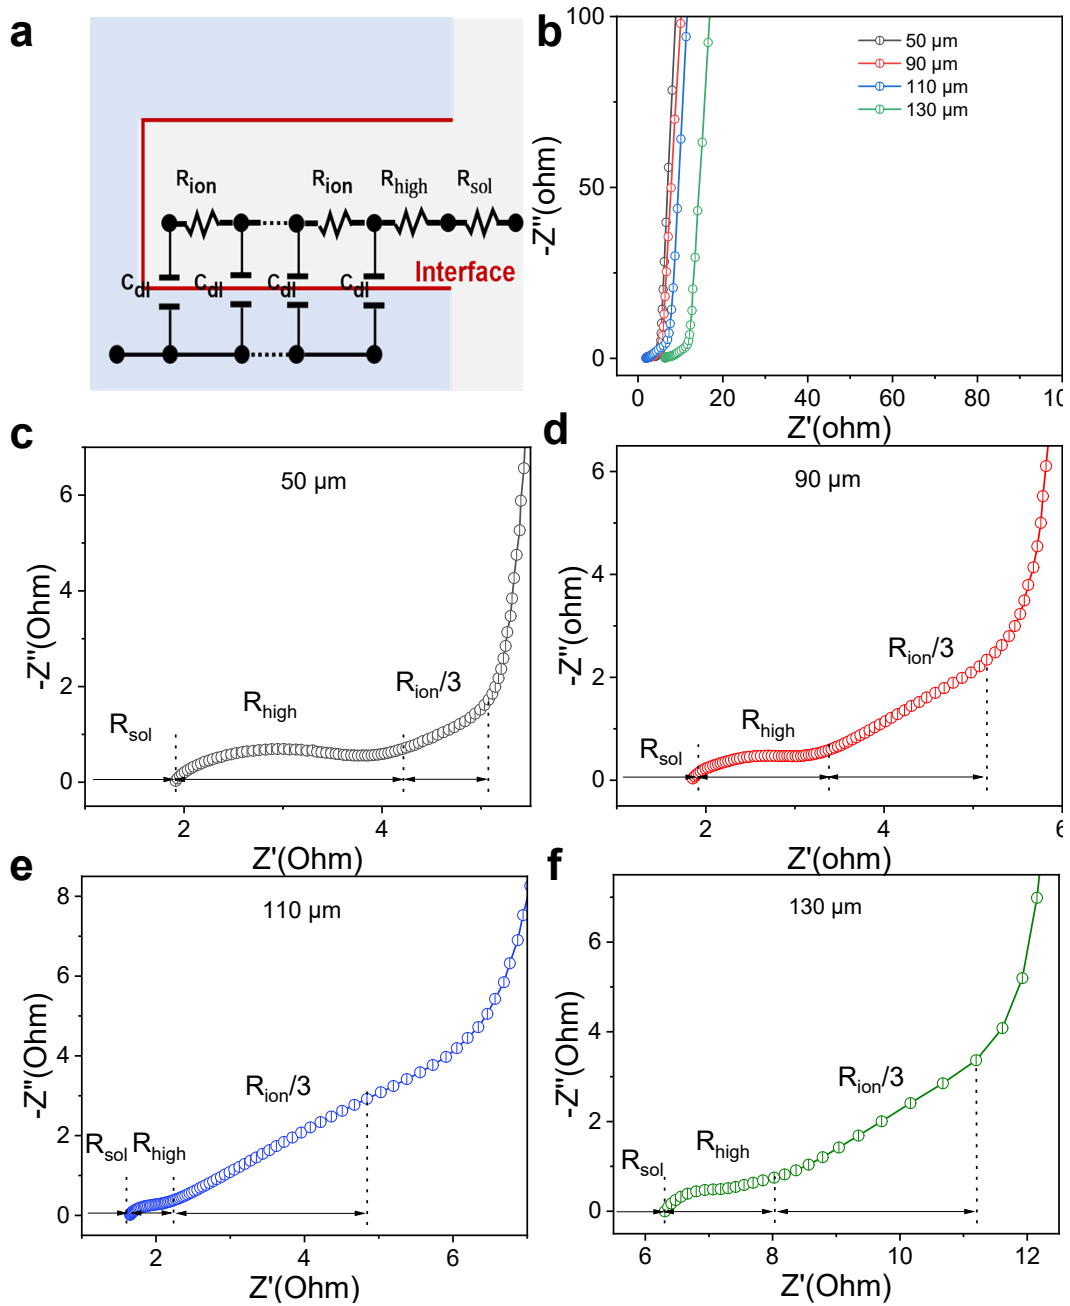

**Fig. S6** (a)The transmission line model schematic diagram. EIS diagram of electrodes of different thickness: (b) general EIS of all thickness electrodes and (c) 50, (d) 90 (e) 110 (f) 130  $\mu\text{m}$ .

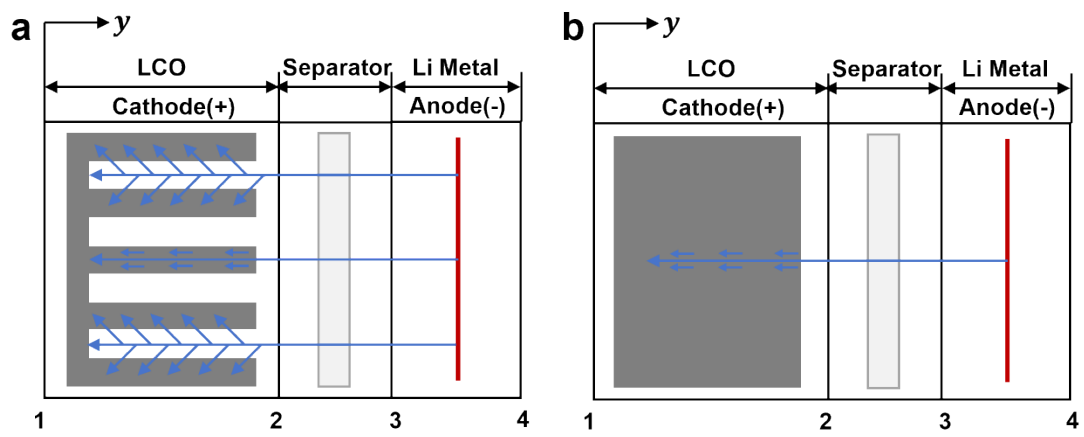

**Fig. S7.** Schematic of the finite element model: (a) ordered structure electrode, (b) flat structure electrode.

### **Model Description:**

A two-dimensional half-cell model based on the framework proposed by J. Newman et al. was developed to calculate lithium-ion concentration distribution in the electrolyte and the cathode ( $\text{LiCoO}_2$ ) to investigate ion transport challenges in thick electrodes. For simplification, a 2D model was constructed based on the cross-section of the battery. The model incorporates the following five fundamental assumptions:

1. The effects of thermal phenomena are neglected, and an isothermal model is established.
2. The electrode material consists of uniformly distributed spherical particles of equal size.
3. Conductive agents and binders are homogeneously distributed within the electrode, forming a continuous conductive network. Ion diffusion within the electrode follows Fick's law, with tortuosity derived from experimental data.
4. Side reactions and gas generation within the cell are ignored.
5. Lithium-ion transport behavior is limited to diffusion and electromigration, while convection effects are neglected.

The 2D LCO/Li model is shown in Figure S7, where Figure S7(a) represents the schematic of the 3D-printed ordered structure electrode, and Figure S7(b) illustrates the conventional flat structure electrode. The blue arrows indicate the direction of lithium-ion transport. Region 12 corresponds to the cathode, and region 23 corresponds to the separator, while the lithium metal anode is defined as the boundary. The electrolyte consists of 1 M  $\text{LiPF}_6$ , distributed across all regions of the model. The related

parameters and definitions are provided in Table S3.

In this model, the current density in the electrolyte is described using the electrolyte potential node, with the governing equation as:

$$i_l = -\sigma_l \nabla \phi_l + \frac{2RT\sigma_l}{F} \left( 1 + \frac{\partial \ln f}{\partial \ln C_l} \right) (1 + t_+) \nabla \ln C_l \# \quad (1.6)$$

where  $i_l$  represents the current density,  $\sigma_l$  is the ion conductivity,  $\phi_l$  is the electrolyte potential,  $R$  is universal gas content,  $T$  is the temperature,  $F$  is the Faraday content,  $f_{\pm}$  is the mean molar activity coefficient of the electrolyte,  $t_+$  is the transference number of lithium ions, and  $C_l$  is the lithium ion concentration in the electrolyte.

The diffusion and migration of lithium ions in the electrolyte follow Fick's law:

$$\frac{\partial C_l}{\partial t} + \nabla \cdot J_l = 0 \# \quad (1.7)$$

$$J_l = -D_l \nabla C_l + \frac{i_l t_+}{F} \# \quad (1.8)$$

where  $J_l$  and  $D_l$  represent the lithium ion flux and the diffusion coefficient in the electrolyte, respectively. Equation (1.7) and (1.8) describe the diffusion and migration process of lithium ion in the electrolyte.

The reaction at the solid-liquid interface is governed by the Butler-Volmer kinetic equation:

$$i_{int} = i_0 \left\{ \exp\left(\frac{\alpha_n F}{RT} \eta\right) - \exp\left(-\frac{\alpha_p F}{RT} \eta\right) \right\} \# \quad (1.9)$$

where  $i_{int}$  represents the local current density,  $i_0$  is the exchange current density,  $\alpha_n$  and  $\alpha_p$  are the charge transfer coefficients for the anode and cathode, respectively, and  $\eta$  is the overpotential of the cell.



The diffusion of lithium ions within the solid-phase particles of the electrode also follows Fick's law:

$$\frac{\partial C_s}{\partial t} + \nabla \cdot J_s = 0 \quad (1.10)$$

$$J_s = -D_s \nabla C_s \quad (1.11)$$

where  $C_s$  and  $J_s$  represent the lithium-ion concentration and flux within the electrode particles, respectively, and  $D_s$  is the lithium-ion diffusion coefficient in the electrode particles.

**Table S1:** 3D print parameters

| Parameter                            | Value/description   |
|--------------------------------------|---------------------|
| Sparse density (%)                   | 30/40/50/60         |
| Printing speed (mm s <sup>-1</sup> ) | 30                  |
| Air pressure (MPa)                   | 0.5                 |
| Layer height (mm)                    | 0.3                 |
| Line width (mm)                      | 0.34                |
| Pattern                              | Aligned rectilinear |
| Heating platform temperature (°C)    | 80                  |

**Table S2:** Impedance spectrum data and tortuosity calculation of symmetric cells

| Thickness ( $\mu\text{m}$ ) | $R_{\text{sol}}$ ( $\Omega$ ) | $R_{\text{high}}$ ( $\Omega$ ) | $R_{\text{ion}}$ ( $\Omega$ ) | $\varepsilon$ (%) | $\tau$ |
|-----------------------------|-------------------------------|--------------------------------|-------------------------------|-------------------|--------|
| 50                          | 1.91                          | 2.28                           | 3.10                          | 41.74             | 15.56  |
| 90                          | 1.85                          | 1.46                           | 5.44                          | 48.14             | 16.81  |
| 110                         | 1.65                          | 2.51                           | 10.21                         | 41.92             | 21.98  |
| 130                         | 6.36                          | /                              | /                             | /                 | /      |

**Table S3** LCO/Li half cell model parameters and definitions

| Abbreviation | Expression/value                 | Description                                |
|--------------|----------------------------------|--------------------------------------------|
| epss_pos     | 0.6                              | Electrode phase volume fraction, cathode   |
| epsl_pos     | 0.4                              | Electrolyte phase volume fraction, cathode |
| rp_pos       | 1.44 [ $\mu\text{m}$ ]           | Particle radius, cathode materials         |
| cl_0         | 2000 [ $\text{mol}/\text{m}^3$ ] | Initial electrolyte salt concentration     |
| Ecell_up     | 4.45 [V]                         | Upper cut-off voltage                      |
| Ecell_low    | 3.0 [V]                          | Cutoff voltage lower limit                 |
| C            | 0.1、 2                           | C-rate factor for the parametric study     |
| T            | 298.15 [K]                       | Temperature                                |
